# Supplementary material for: Transposable elements transcription-dependently generate introns in eukaryotes
Source: Research Square preprint supplement (doi:10.21203/rs.3.rs-3259485/v1), 2023-11-01
Supplement: Supplementary file 1 [file a784dc559e88fbf604bcd184.xlsx]

## Sheet: ST_1
Supplemental Table 1. Genomes used to calculate CpG o/e bias
This table is related to Supplemental Figure 1.
Category	Species	Scientific name	URL
Mammal	Human	Homo sapiens	http://asia.ensembl.org/Homo_sapiens/
	Chimpanzee	Pan troglodytes	http://asia.ensembl.org/Pan_troglodytes/
	Mouse	Mus musculus	http://asia.ensembl.org/Mus_musculus/
Fish	Zebrafish	Danio rerio	http://asia.ensembl.org/Danio_rerio/
	Cave fish	Astyanax mexicanus	http://asia.ensembl.org/Astyanax_mexicanus/
	Clownfish	Amphiprion ocellaris	http://asia.ensembl.org/Amphiprion_ocellaris/
Bird	Chicken	Gallus gallus	http://asia.ensembl.org/Gallus_gallus/
	Turkey	Meleagris gallopavo	http://asia.ensembl.org/Meleagris_gallopavo/
	Zebra Finch	Taeniopygia guttata	http://asia.ensembl.org/Taeniopygia_guttata/
Plant	Arabidopsis	Arabidopsis thaliana	https://genome.jgi.doe.gov/portal/pages/dynamicOrganismDownload.jsf?organism=Athaliana
	Soybean	Glycine max	https://genome.jgi.doe.gov/portal/pages/dynamicOrganismDownload.jsf?organism=Gmax
	Rice	Oryza sativa	https://genome.jgi.doe.gov/portal/pages/dynamicOrganismDownload.jsf?organism=Osativa

## Sheet: ST_2
Supplemental Table 2. Intron groups divided by CpG o/e values
This table is related to Figure 1 and 2, and Supplemental Figure 2-8.
intron group	1	2	3	4	5	6	total
group border (log2(CpG o/e value))		-10	-1.1	-0.7	-0.4	0
intron number	18523	7784	14325	12255	12973	8819	74679
singleton intron number	17054	7358	13386	11268	11804	8021	68891
clustered intron number	1469	426	939	987	1169	798	5788
cluster number	372	135	321	328	292	159	1607
average intron number per cluster	3.94892	3.15556	2.92523	3.00915	4.00342	5.01887	3.60174
representative (clustered) intron number	17426	7493	13707	11596	12096	8180	70498
The group 1 contains introns with ultra low CpG o/e values because of very low GC content.

## Sheet: ST_3
Supplemental Table 3. Representative introns' best matches in genomic regions
This table is related to Figure 1(a,b).
intron group	1		2		3		4		5		6		total
	count	percentage	count	percentage	count	percentage	count	percentage	count	percentage	count	percentage
matched intron	124	0.504065	35	0.239726	90	0.316901	72	0.256228	75	0.201613	60	0.27027	456
matched exon	27	0.109756	25	0.171233	40	0.140845	35	0.124555	58	0.155914	26	0.117117	211
matched intergenic region	81	0.329268	53	0.363014	88	0.309859	97	0.345196	160	0.430108	104	0.468468	583
matched intron+exon	14	0.0569106	33	0.226027	66	0.232394	77	0.274021	79	0.212366	32	0.144144	301
total	246	1	146	1	284	1	281	1	372	1	222	1	1551
		Chi-squared test p value
	between group 6 and group 5	0.0404
	between group 6 and group 4	0.0023
	between group 6 and group 3	0.0021
	between group 6 and group 2	0.0499

## Sheet: ST_4
Supplemental Table 4. Representative introns' all matches in genomic regions
This table is related to Figure 1(c,d).
intron group	1		2		3		4		5		6		total
	count	percentage	count	percentage	count	percentage	count	percentage	count	percentage	count	percentage
matched intron	164	0.112715	44	0.0174811	108	0.165138	97	0.0726048	112	0.0434445	83	0.119253	608
matched exon	56	0.038488	47	0.018673	62	0.0948012	60	0.0449102	144	0.0558573	81	0.116379	450
matched intergenic region	1118	0.768385	2168	0.861343	380	0.58104	1003	0.750749	2046	0.793638	461	0.662356	7176
matched intron+exon	117	0.0804124	258	0.102503	104	0.159021	176	0.131737	276	0.10706	71	0.102011	1002
total	1455	1	2517	1	654	1	1336	1	2578	1	696	1	9236
		Chi-squared test p value
	between group 6 and group 5	2.30×10-20
	between group 6 and group 4	1.65×10-11
	between group 6 and group 3	0.0003
	between group 6 and group 2	1.04×10-64

## Sheet: ST_5
Supplemental Table 5. All introns' best matches in genomic regions
This table is related to Supplemental Figure 3.
intron group	1		2		3		4		5		6		total
	count	percentage	count	percentage	count	percentage	count	percentage	count	percentage	count	percentage
matched intron	441	0.697785	136	0.494545	257	0.525562	214	0.444906	251	0.418333	164	0.419437	1463
matched exon	34	0.0537975	25	0.0909091	48	0.0981595	46	0.0956341	60	0.1	28	0.0716113	241
matched intergenic region	140	0.221519	76	0.276364	107	0.218814	137	0.284823	204	0.34	160	0.409207	824
matched intron+exon	17	0.0268987	38	0.138182	77	0.157464	84	0.174636	85	0.141667	39	0.0997442	340
total	632	1	275	1	489	1	481	1	600	1	391	1	2868
		Chi-squared test p value
	between group 6 and group 5	0.036
	between group 6 and group 4	0.0001
	between group 6 and group 3	2.40×10-8
	between group 6 and group 2	0.0044

## Sheet: ST_6
Supplemental Table 6. All introns' all matches in genomic regions
This table is related to Supplemental Figure 4.
intron group	1		2		3		4		5		6		total
	count	percentage	count	percentage	count	percentage	count	percentage	count	percentage	count	percentage
matched intron	1892	0.0783015	437	0.03744	643	0.0998913	1109	0.0728025	1255	0.0837337	1690	0.0798186	7026
matched exon	134	0.00554567	71	0.00608293	86	0.0133603	106	0.00695858	168	0.011209	144	0.00680111	709
matched intergenic region	20969	0.867814	10271	0.879969	5404	0.839522	13274	0.871398	12753	0.850881	18673	0.881925	81344
matched intron+exon	1168	0.0483384	893	0.0765079	304	0.047227	744	0.0488413	812	0.0541767	666	0.0314552	4587
total	24163	1	11672	1	6437	1	15233	1	14988	1	21173	1	93666
		Chi-squared test p value
	between group 6 and group 5	1.41×10-30
	between group 6 and group 4	2.25×10-16
	between group 6 and group 3	2.80×10-20
	between group 6 and group 2	8.91×10-115

## Sheet: ST_7
Supplemental Table 7. Distribution of the representative introns and their best matched fragments in chromosomes
This table is related to Figure 2a.
Chromosome introns from	Matches in the same chromosome	Matches in the same chromosome (%)	Matches not in the same chromosome	Matches not in the same chromosome (%)	ratio (matches in/not in the same chromosome)	Length of chromosome (Mb)	length of current chromosome / length of all chromosomes	Length of other chromosomes (Mb)	length of other chromosomes / length of all chromosomes	ratio (length of current chromosome/length of other chromosomes)
Chr1	260	0.634146	150	0.365854	1.73333	30.43	0.255371	88.73	0.744629	0.342951
Chr2	100	0.298507	235	0.701493	0.425532	19.7	0.165324	99.46	0.834676	0.19807
Chr3	199	0.619938	122	0.380062	1.63115	23.46	0.196878	95.7	0.803122	0.245141
Chr4	159	0.625984	95	0.374016	1.67368	18.59	0.156009	100.57	0.843991	0.184846
Chr5	212	0.656347	111	0.343653	1.90991	26.98	0.226418	92.18	0.773582	0.292688
If the introns' matches (putative source or target of intron) distribute in chromosomes randomly, the numbers of matches in the same chromosome should correlate with chromosome length. Chi-squared test shown that the distribution is not random, and intron significantly tend to match the same chromosome of itself.
Chi-squared test p value:	9.14×10-26

## Sheet: ST_8
Supplemental Table 8. Distribution of the representative introns and their best matched fragments in strand
This table is related to Figure 2b.
Chromosome introns from	Matches in the same strand	Matches in the same strand (%)	Matches not in the same strand	Matches not in the same strand (%)	ratio (matches in/not in the same strand)
Chr1	182	0.7	78	0.3	2.33333
Chr2	62	0.62	38	0.38	1.63158
Chr3	145	0.728643	54	0.271357	2.68519
Chr4	137	0.861635	22	0.138365	6.22727
Chr5	149	0.70283	63	0.29717	2.36508
Binomial test p value:	1.80×10-44

## Sheet: ST_9
Supplemental Table 9. Distribution of the representative introns and their all matched fragments in chromosomes
This table is related to Supplemental Figure 5a.
Chromosome introns from	Matches in the same chromosome	Matches in the same chromosome (%)	Matches not in the same chromosome	Matches not in the same chromosome (%)	ratio (matches in/not in the same chromosome)	Length of chromosome (Mb)	length of current chromosome / length of all chromosomes	Length of other chromosomes (Mb)	length of other chromosomes / length of all chromosomes	ratio (length of current chromosome/length of other chromosomes)
Chr1	3759	0.78772	1013	0.21228	3.71076	30.43	0.255371	88.73	0.744629	0.342951
Chr2	326	0.151136	1831	0.848864	0.178045	19.7	0.165324	99.46	0.834676	0.19807
Chr3	299	0.476874	328	0.523126	0.911585	23.46	0.196878	95.7	0.803122	0.245141
Chr4	744	0.569243	563	0.430757	1.32149	18.59	0.156009	100.57	0.843991	0.184846
Chr5	271	0.569328	205	0.430672	1.32195	26.98	0.226418	92.18	0.773582	0.292688
If the introns' matches (putative source or target of intron) distribute in chromosomes randomly, the numbers of matches in the same chromosome should correlate with chromosome length. Chi-squared test shown that the distribution is not random, and intron significantly tend to match the same chromosome of itself.
Chi-squared test p value:	<2.2×10-16

## Sheet: ST_10
Supplemental Table 10. Distribution of the representative introns and their all matched fragments in strand
This table is related to Supplemental Figure 5b.
Chromosome introns from	Matches in the same strand	Matches in the same strand (%)	Matches not in the same strand	Matches not in the same strand (%)	ratio (matches in/not in the same strand)
Chr1	2998	0.797553	761	0.202447	3.93955
Chr2	184	0.564417	142	0.435583	1.29577
Chr3	203	0.67893	96	0.32107	2.11458
Chr4	560	0.752688	184	0.247312	3.04348
Chr5	194	0.715867	77	0.284133	2.51948
Binomial test p value:	<2.2×10-16

[truncated: 15 more sheets: ST_11, ST_12, ST_13, ST_14, ST_15, ST_16, ST_17, ST_18, ST_19, ST_20, ST_21, ST_22, ST_23, ST_24, ST_25]
